# Supplementary material
Source: Springer Nature journal article supplement (https://www.springermedizin.de/resource/supplementary/13012_2014_749_MOESM1_ESM.pdf/9630606)

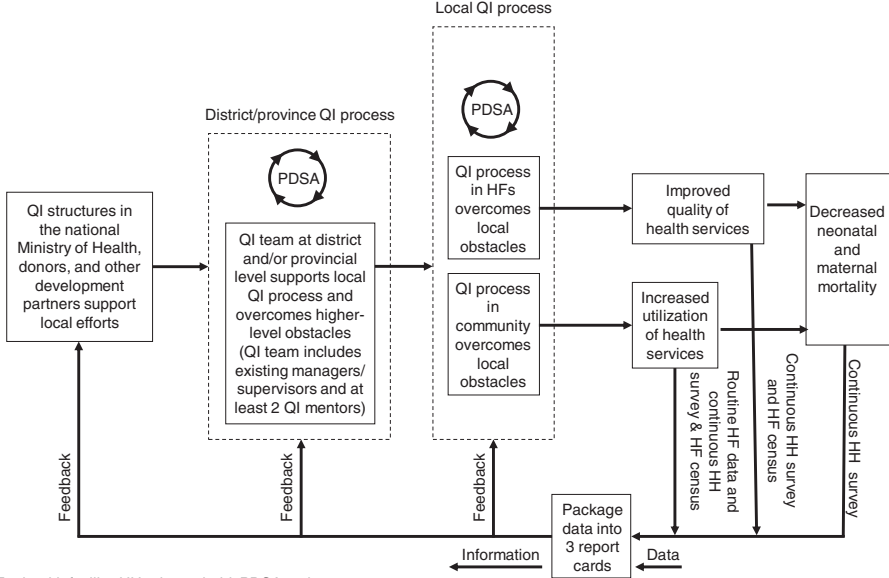

HF = health facility, HH = household, PDSA = plan-do-study-act cycles, QI = quality improvement

Supplement: MOESM1 [file 9630606]
